# Supplementary material for: Non-Mature miRNA-Encoded Micropeptide miPEP166c Stimulates Anthocyanin and Proanthocyanidin Synthesis in Grape Berry Cells
Source: MDPI journal article supplement (doi:10.3390/ijms25031539), 2024-01-26
Supplement: s1 [file s1]

**Supplementary Table S1:** Primers forward (F) and reverse (R) used for gene expression analysis by qPCR.

| Gene                  | Acession number   | Primers                                                                         | Ref.                                 |
|-----------------------|-------------------|---------------------------------------------------------------------------------|--------------------------------------|
| <i>VviDFR</i>         | Vitvi18g00988     | F: 5'-GGCTTTCTAGCGAGAGCGTA-3'<br>R: 5'-ACTCTCATTTCGGGCACATT-3'                  | [30]                                 |
| <i>VviLDOX</i>        | Vitvi13g00055     | F: 5'-ACCTTCATCCTCCACAACAT – 3'<br>R: 5'-AGTAGAGCCTCCTGGGTCTT – 3'              | [31]                                 |
| <i>VviLAR1</i>        | Vitvi01g00234     | F: 5'-CAGGAGGCTATGGAGAAGATAC – 3'<br>R: 5'-ACGCTTCTCTCTGTACATGTTG – 3'          | [31]                                 |
| <i>VviANR</i>         | Vitvi10g02185     | F: 5'-CAATACCAGTGTTCTGAGC – 3'<br>R: 5'-AAACTGAACCCCTCTTTCAC – 3'               | [31]                                 |
| <i>VviUFGT1</i>       | Vitvi16g00156     | F: 5'-TGCAGGGCCTAACTCACTCT-3'<br>R: 5'-GCAGTCGCCTTAGGTAGCAC-3'                  | Designed with the aid of QuantiPrime |
| <i>VviGST4</i>        | Vitvi04g00880     | F: 5'-AAGGATCCATGGTGATGAAGGTGTATGGC-3'<br>R: 5'-AACTGCAGAAGCCAACCAACCAACAAAC-3' | [32]                                 |
| <i>VviMATE1</i>       | Vitvi16g01911     | F: 5'-TGCTTTTGTGATTTTGTTAGAGG-3'<br>R: 5'-CCCTTCCCCGATTGAGAGTA-3'               | [33]                                 |
| <i>VviMYBPA1</i>      | Vitvi13g00055     | F: 5'-AGATCAACTGGTTATGCTTGCT-3<br>R: 5'-AACACAAATGTACATCGCACAC-3                | [2]                                  |
| <i>VviMYBA1</i>       | Vitvi02g01019     | F: 5'-AGAACAGGTTTCGAGGTTG-3'<br>R: 5'-TCTATTCAACCCTGCTCGG-3                     | [5]                                  |
| <i>VviMYBA2</i>       | Vitvi02g01015     | F: 5'-GCAGGGTTGAATAGATGCCTAAA-3'<br>R: 5'-CTCGTCTAATGCCAACTCTCCTCTC-3'          | [34]                                 |
| <i>VviMYBC2-L1</i>    | Vitvi01g00401     | F: 5' -GCAACCGCTGGTCACTGAT-3'<br>R: 5' -CGAGGGCGAGGGAAATTGT-3'                  | [4]                                  |
| <i>Vvipre-miR166c</i> | NR_127751         | F: 5'-TTGAGCAAGATGGAGAAGCA – 3'<br>R: 5'-ATTGGTTTGTGGTGCATGAG – 3'              | Designed in this study               |
| <i>VviActin</i>       | Vitvi04g01613     | F: 5'-GTGCCTGCCATGTATGTTGCC-3'<br>F: 5'-GTGCCTGCCATGTATGTTGCC-3'                | [35]                                 |
| <i>VviGADPH</i>       | GSVIVT00009717001 | F: 5'-CACGGTCAGTGAAGCATCAT-3'<br>R: 5'-CCTTGTCAGTGAACACACCAG-3'                 | [35]                                 |
